# Supplementary material for: Resting-state dopaminergic cell firing in the ventral tegmental area negatively regulates affiliative social interactions in a developmental animal model of schizophrenia
Source: PubMed Central journal article supplement (PMC8062445; doi:10.1038/s41398-021-01346-2), 2021-04-22
Supplement: 41398_2021_1346_MOESM1_ESM.pdf [file 41398_2021_1346_MOESM1_ESM.pdf]

## **SUPPLEMENTARY Materials**

Resting state dopaminergic cell firing in the ventral tegmental area negatively regulates affiliative social interactions in a developmental animal model of schizophrenia

H. Sotoyama, H. Namba, Y. Kobayashi, M. T Hasegawa, D. Watanabe, E. Nakatsukasa, K. Sakimura, T. Furuyashiki, and H. Nawa

**FIGURE S1;** Estimation of hM4Gi/mCherry-positive cell ratios in VTA.

**FIGURE S2;** Dopamine receptor-like immunoreactivities in the prelimbic cortex of control and EGF model rats.

**FIGURE S3 ;** Evaluation of CNO effects on social behaviors and firing rates of putative dopaminergic cells in EGF-challenged Long-Evans rats.

**FIGURE S4;** Influences of CNO on exploratory locomotion of EGF-challenged Long-Evans rats.

**Table S1;** Animal allocation and data correspondence.

**Table S2;** Statistical data and tests applied.

## TH-cre Rat1

Cell ratio of mCherry+TH+/TH+  
= 0.435

Cell ratio of  
mCherry alone +/mCherry+  
= 0.000

---

Cell ratio of mCherry+TH+/TH+  
= 0.494

Cell ratio of  
mCherry alone +/mCherry+  
= 0.026

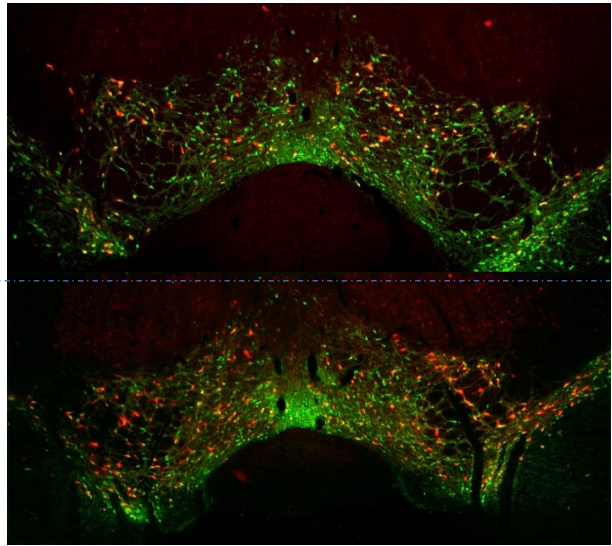

## TH-cre Rat2

Cell ratio of mCherry+/TH+  
= 0.627

Cell ratio of  
mCherry alone +/mCherry+  
= 0.024

---

Cell ratio of mCherry+TH+/TH+  
= 0.664

Cell ratio of  
mCherry alone +/mCherry+  
= 0.028

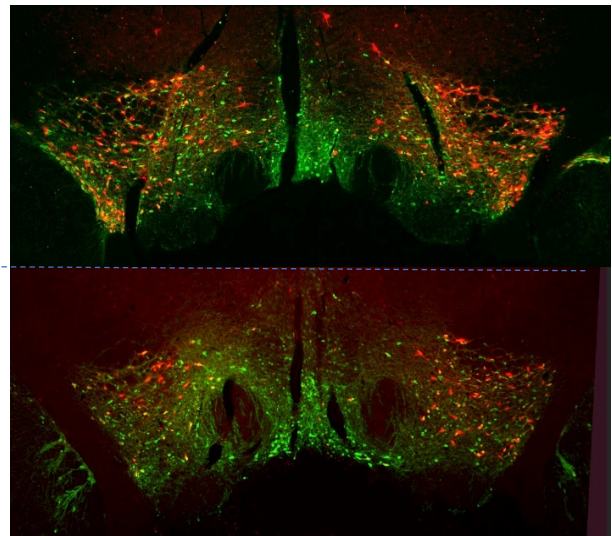

## TH-cre Rat3

Cell ratio of mCherry+TH+/TH+  
= 0.295

Cell ratio of  
mCherry alone +/mCherry+  
= 0.112

---

Cell ratio of mCherry+TH+/TH+  
= 0.376

Cell ratio of  
mCherry alone +/mCherry+  
= 0.042

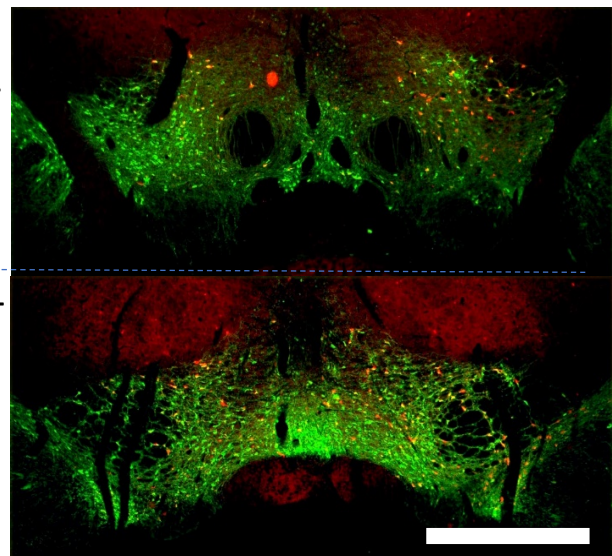

## Summary

Cell ratio of mCherry+TH+/TH+  
= 0.482+/-0.059

Cell ratio of mCherry alone +/mCherry+ = 0.039+/-0.016

**Supplemental Figure S1; Estimation of hM4Gi/mCherry-positive cell ratios in VTA.** AAV vectors was injected into the left and right hemispheres of VTA of the Cre-driver rats (N=3 x 2). The central areas of the VTA were immunostained with the anti-tyrosine hydroxylase (TH) antibody (Green). Note: The colour balance between red and green channels was optimized to count their double staining. The anti-Th antibody was obtained from Chemicon Int (1: 300 dilution; Catalogue#152). A white bar represents 2.0 mm.

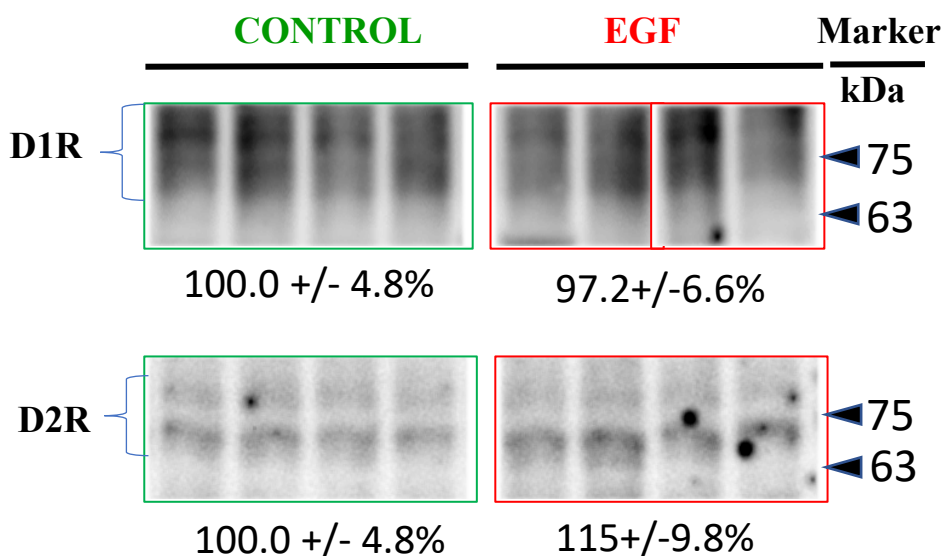

**Supplemental Figure S2; Dopamine receptor-like immunoreactivities in the prelimbic cortex of control and EGF model rats.** After behavioral tests, EGF-challenged rats were dissected and the tissue of their prelimbic cortex was taken and stored in a deep freezer. The tissue homogenates were subjected to immunoblotting with the knockout mouse-validated antibodies (Nittobo Medical Ltd., Tokyo Japan) raised against dopamine receptors D1R (<https://nittobo-nmd.co.jp/pdf/reagents/D1R.pdf>) and D2R (<https://nittobo-nmd.co.jp/pdf/reagents/D2R.pdf>). The immunoreactivities for the dopamine receptors are known to be distributed broadly with the given glycosylation and sensitive to heat-denaturation. There were no significant differences in the total strength of their immunoreactivity between groups.

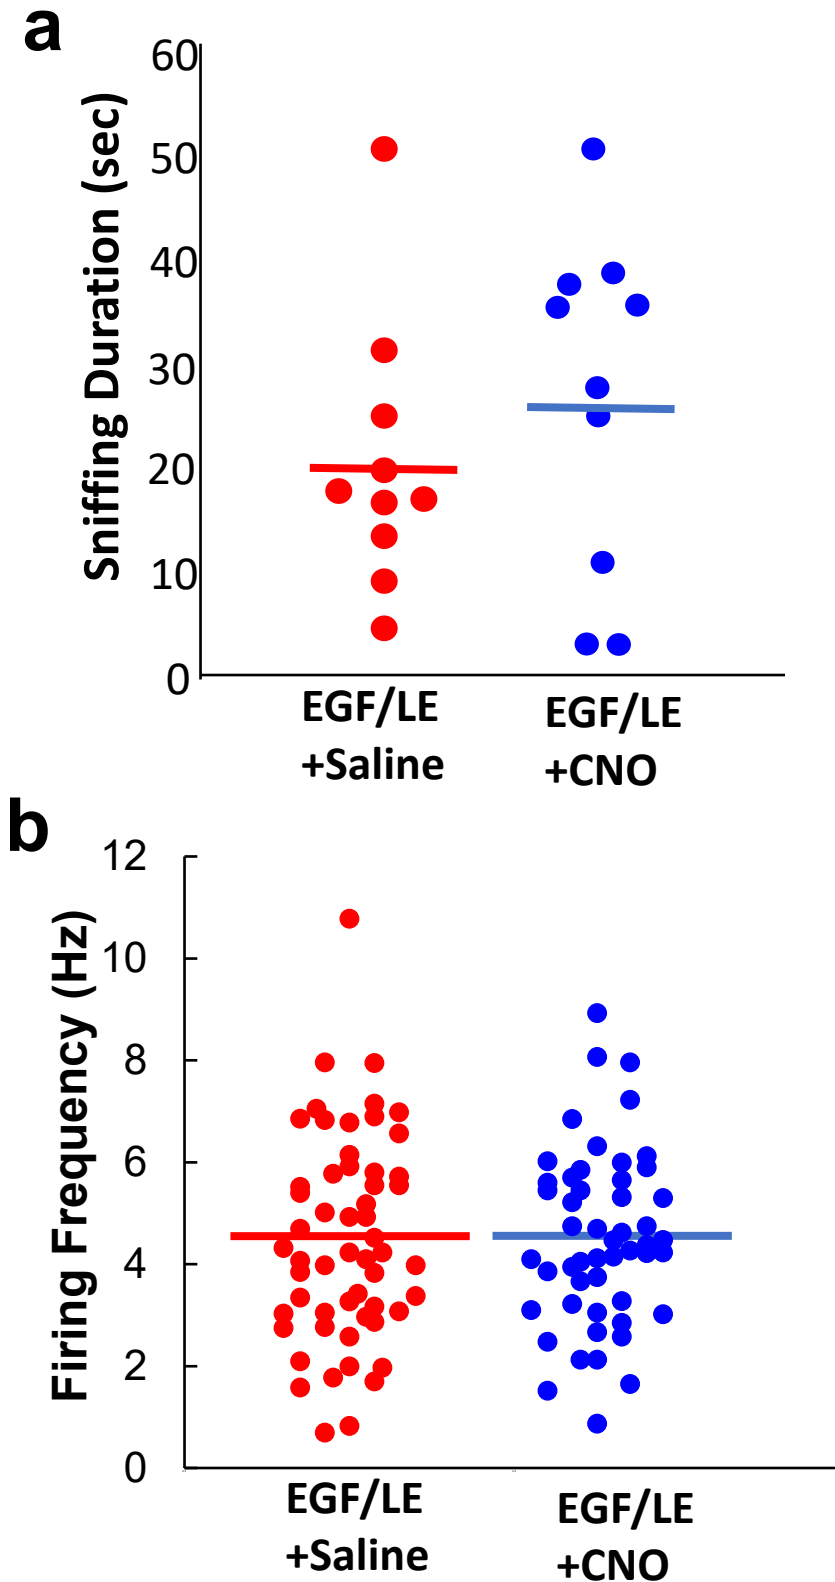

**Supplemental Figure S3; Evaluation of CNO effects on social behaviors and firing rates of putative dopaminergic cells in EGF-challenged Long-Evans rats.** CNO or saline were subchronically administered from osmotic pumps to EGF-challenged rats without AAV infection (N=10 rats each). The dose of CNO (~1.5mg/kg/day) had no significant influences on sniffing duration (a) or on firing frequency of putative dopaminergic cells in VTA (b). Horizontal bars represent means.

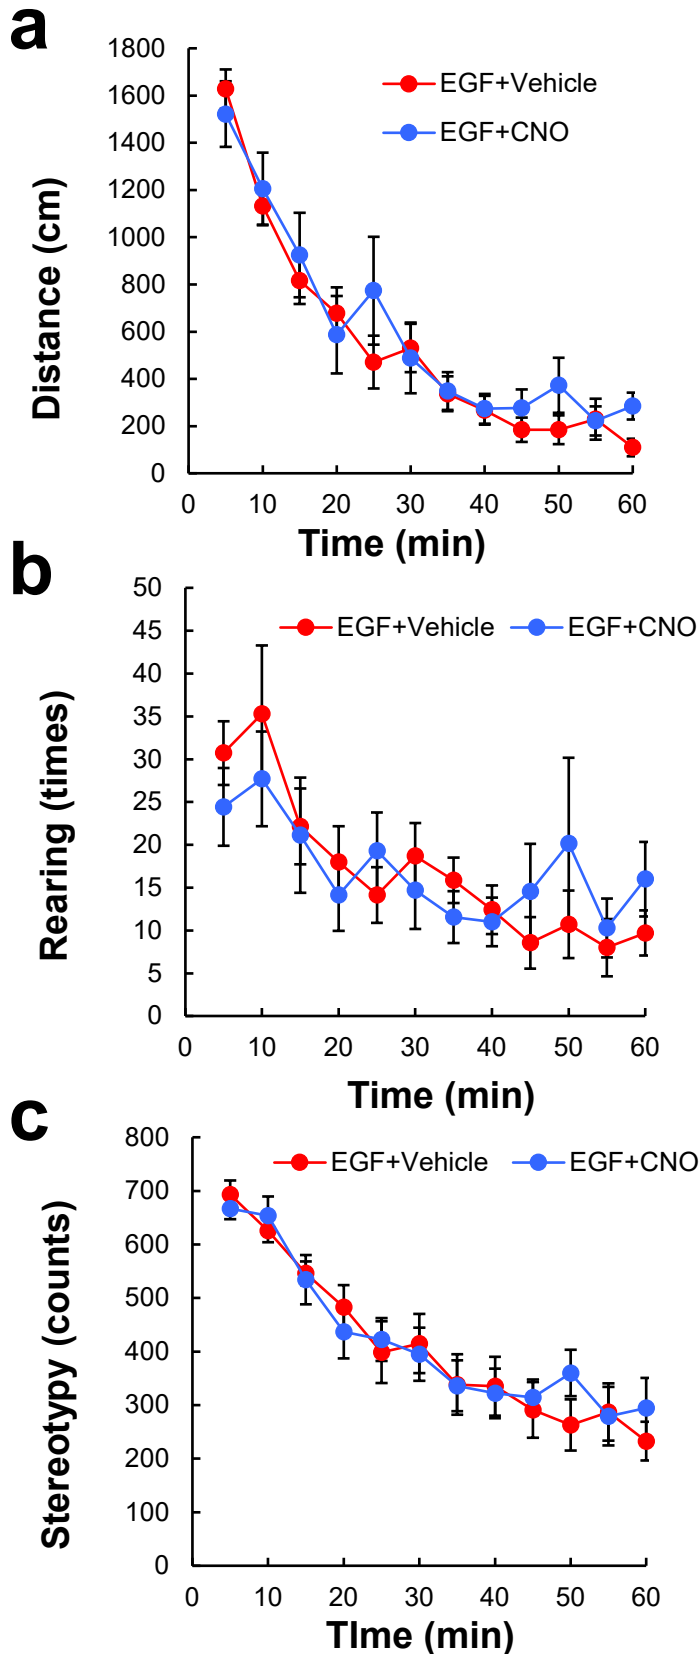

**Supplemental Figure S4; Influences of CNO on exploratory locomotion of EGF-challenged Long-Evans rats.** CNO or saline was subchronically administered from an osmotic pump to the EGF-challenged rat without AAV infection (N=7 rats each). The dose of CNO (~1.5mg/kg/day) had no significant effects on horizontal movement (a; Distance), rearing movement (b; Rearing), and repeated movement (c; Stereotypy).

**Supplemental Table S1; Animal Allocation and Data Correspondence between Figure 4 and Figure 5.**

Using the data of Figure 4, we performed Pearson's correlation analysis. Each animal carrying mCherry or hM4Di viral vector and treated with CNO was subjected to the experimental sequence of social interaction test (sniffing), in vivo dialysis of dopamine (DA), and VTA unit recording as shown below. Some of the rats were fixed with paraformaldehyde solution without the experiments of in vivo dialysis and VTA unit recording. The rat (animal #27) which broke the guide cannula on the head was excluded from the in vivo dialysis experiment.

| Animal | Group   | VIRUS   | CNO    | Sniffing (sec) | Basal DA (nM)      | mean VTA firing (Hz) | Other            |
|--------|---------|---------|--------|----------------|--------------------|----------------------|------------------|
|        |         |         | DREADD | Fig4b & Fig5ab | Fig4c & Fig5b      | Fig4a & Fig5a        | Experimental Use |
| 1      | Control | mCherry | +      | 75.59          | 0.142779147        | 2.566666667          |                  |
| 2      | Control | mCherry | +      | 80.96          | 0.122210427        | 3.11125              |                  |
| 3      | Control | mCherry | +      | 103.29         | 0.19715163         | 2.108181818          |                  |
| 4      | Control | mCherry | +      | 76.36          | 0.179172559        | 3.812                |                  |
| 5      | Control | mCherry | +      | 112.63         | 0.220888045        | 3.409230769          |                  |
| 6      | Control | mCherry | +      | 89.73          | 0.129941873        | 2.26                 |                  |
| 7      | Control | mCherry | +      | 71.63          |                    |                      | histchemistry    |
| 8      | Control | mCherry | +      | 58.47          |                    |                      | histchemistry    |
| 9      | Control | mCherry | +      | 44.76          |                    |                      | histchemistry    |
| 10     | Control | mCherry | +      | 80.53          |                    |                      | histchemistry    |
| 11     | EGF     | mCherry | +      | 65.13          | 0.278057305        | 2.556                |                  |
| 12     | EGF     | mCherry | +      | 52.29          | 0.325807771        | 5.298461538          |                  |
| 13     | EGF     | mCherry | +      | 69.51          | 0.240656875        | 3.945                |                  |
| 14     | EGF     | mCherry | +      | 63.09          | 0.272071881        | 3.474                |                  |
| 15     | EGF     | mCherry | +      | 55.31          | 0.262371643        | 3.803333333          |                  |
| 16     | EGF     | mCherry | +      | 82.64          | 0.288317193        | 4.212727273          |                  |
| 17     | EGF     | mCherry | +      | 77.43          | 0.212562238        | 4.557272727          |                  |
| 18     | EGF     | mCherry | +      | 38.56          |                    |                      | histchemistry    |
| 19     | EGF     | mCherry | +      | 23.98          |                    |                      | histchemistry    |
| 20     | EGF     | mCherry | +      | 43.97          |                    |                      | histchemistry    |
| 21     | EGF     | hM4Di   | +      | 139.89         | 0.164236006        | 1.23                 |                  |
| 22     | EGF     | hM4Di   | +      | 90.03          | 0.150310211        | 1.5775               |                  |
| 23     | EGF     | hM4Di   | +      | 59.06          | 0.145744032        | 2.693333333          |                  |
| 24     | EGF     | hM4Di   | +      | 77.01          | 0.130006427        | 2.989                |                  |
| 25     | EGF     | hM4Di   | +      | 104.68         | 0.14388087         | 4.12625              |                  |
| 26     | EGF     | hM4Di   | +      | 84.77          | 0.137679069        | 3.153333333          |                  |
| 27     | EGF     | hM4Di   | +      | 82.43          | gui de di sconnect | 2.522666667          |                  |
| 28     | EGF     | hM4Di   | +      | 92.84          |                    |                      | histchemistry    |
| 29     | EGF     | hM4Di   | +      | 46.16          |                    |                      | histchemistry    |
| 30     | EGF     | hM4Di   | +      | 89.63          |                    |                      | histchemistry    |

**Supplemental Table S2; Statistical data and tests applied.** In order to select proper statistical test, all data were initially subjected to the Kolmogorov–Smirnov or Shapiro-Wilk test for the normal distribution and the M or Levene test for homogeneity of variances, followed by the parametric or nonparametric comparisons. To keep the statistical power, the same statistical comparisons were applied in the same experimental category of data to keep the statistical power in the same experiment.

| Fig        | explanatory variable                   | dependent variable         | sample size                 | distribution normality  | variation homogeneity | statistical test         | comparisons             | statistical values       | probability   | Multiple Comparison Compensation |          |       |
|------------|----------------------------------------|----------------------------|-----------------------------|-------------------------|-----------------------|--------------------------|-------------------------|--------------------------|---------------|----------------------------------|----------|-------|
|            |                                        |                            |                             | Smirnov or Shapiro-Wilk | Box's M or Levene     |                          |                         |                          |               | Main post-hoc                    | Holm etc |       |
| 1A-1C      | CON/EGF                                | frequency                  | 48/46                       | 0.346, 0.986            | 0.516                 | Mann-Whitney             | CON vs EGF              | U=810.5, Z=2.22          | 0.026         |                                  |          |       |
|            |                                        |                            | 42/41                       | 0.119, 0.013            | 0.304                 | Mann-Whitney             | CON vs EGF              | U=805.5, Z=0.506         | 0.506         |                                  |          |       |
|            |                                        |                            | 44/41                       | 0.600, 0.051            | 0.166                 | Mann-Whitney             | CON vs EGF              | U=866.5, Z=0.312         | 0.755         |                                  |          |       |
| 2A         | CON/EGF                                | sniffing duration          | 8/8                         | 0.011, 0.838            | 0.827                 | Mann-Whitney             | CON vs EGF              | U=9, Z=2.416             | 0.016         |                                  |          |       |
| 2B         | CON/EGF                                | frequency before           | 20/17                       | 0.920, 0.045            | 0.002                 | Mann-Whitney             | CON vs EGF              | U=82, Z=2.681            | 0.007         | 0.021                            |          |       |
|            |                                        | frequency after            | 20/17                       | <0.001, <0.001          | 0.128                 | Mann-Whitney             | CON vs EGF              | U=115, Z=1.676           | 0.094         | 0.188                            |          |       |
|            |                                        | before/after frequency CON | 20/20                       | 0.920, <0.001           | 0.690                 | Mann-Whitney             | Before vs After         | U=104, Z=2.599           | 0.009         | 0.027                            |          |       |
|            |                                        | frequency EGF              | 17/17                       | 0.045, <0.001           | 0.244                 | Mann-Whitney             | Before vs After         | U=123, Z=0.741           | 0.459         | 0.459                            |          |       |
|            | CON/EGF, time                          | frequency in each time     | 20/17, (20)                 | <0.001-0.862            | 0.035-0.704           | Mann-Whitney             | CON vs EGF              | U=77.5-147, Z=0.701-2.82 | 0.008-0.483   | NA                               |          |       |
| 2C         | CON/EGF vs before/after                | mean SWB before            | 20/17                       | 0.286, 0.640            | 0.161                 | two-way ANOVA            | CON/EGF vs before/after | main before F=10.06      | 0.002         |                                  |          |       |
|            |                                        | mean SWB after             | 20/17                       | 0.560, 0.344            | 0.787                 |                          |                         | main EGF F=6.113         | 0.0158        |                                  |          |       |
|            |                                        | mean SWB CON               | 20/20                       | 0.286, 0.560            | 0.545                 | ANOVA                    | each pairs              | interaction F=0.909      | 0.343         |                                  |          |       |
|            |                                        | mean SWB EGF               | 17/17                       | 0.640, 0.344            | 0.660                 |                          |                         | Tukey                    | each pairs    |                                  | 0.0239   | done  |
|            | CON/EGF, time                          | SWB in each time           | 18/12, (20)                 | <0.001-0.862            | 0.035-0.704           | Mann-Whitney             | CON vs EGF              | U=83-147, Z=2.652-0.701  | 0.008-0.483   | NA                               |          |       |
| 3A         | CON/EGF/RIS                            | sniffing duration          | 29/28/23                    | 0.048-0.943             | <0.001                | Kruskal-Wallis           | 3 groups                | H=17.97                  | <0.001        |                                  |          |       |
|            |                                        |                            |                             |                         |                       | Steel                    | 2 pairs                 | T=3.91, 2.67             | 0.001, 0.0147 | done                             |          |       |
| 3B         | CON/EGF/RIS                            | frequency                  | 63/72/67                    | 0.001-0.042             | 0.479                 | Kruskal-Wallis           | 3 groups                | H=17.27                  | <0.001        |                                  |          |       |
|            |                                        |                            |                             |                         |                       | Steel                    | 2 pairs                 | T=3.69, 3.44             | <0.001, 0.001 | done                             |          |       |
| 3C         | CON/EGF/RIS                            | DA level                   | 8/7/8                       | 0.145-0.919             | 0.053                 | one-way ANOVA            | 3 groups                | F(2,20)=26.72            | <0.001        |                                  |          |       |
|            |                                        |                            |                             |                         |                       | Tukey                    | each pairs              |                          | <0.001-0.012  | done                             |          |       |
| 4A         | CON+mCherry/EGF+mCherry/EGF+M4Di       | frequency                  | 55/52/53                    | 0.003-0.139             | <0.001                | Kruskal-Wallis           | 3 groups                | H=15.20                  | <0.001        |                                  |          |       |
|            |                                        |                            |                             |                         |                       | Steel                    | 2 pairs                 | T=3.20, 3.55             | <0.001, 0.003 | done                             |          |       |
| 4B         | CON+mCherry/EGF+mCherry/EGF+M4Di       | sniffing duration          | 10/10/10                    | 0.286-0.916             | 0.93                  | Kruskal-Wallis           | 3 groups                | H=8.47                   | 0.0144        |                                  |          |       |
|            |                                        |                            |                             |                         |                       | Steel                    | 2 pairs                 | T=2.65, 2.27             | 0.016, 0.044  | done                             |          |       |
| 4C         | CON+mCherry/EGF+mCherry/EGF+M4Di, time | DA level for all           | 6/7/6 x 20                  | 0.063-0.966             | 0.052-0.689           | two-way ANOVA            | 3 groups                | main EGF F=5.741         | 0.013         |                                  |          |       |
|            |                                        |                            |                             |                         |                       | repeated ANOVA           | each time               | main time F=40.80#       | <0.001        |                                  |          |       |
|            |                                        | one-way ANOVA              | 3 groups                    | interaction F=2.668#    | 0.015                 |                          |                         |                          |               |                                  |          |       |
|            |                                        | Tukey                      | each pairs at each time bin | F=0.56-18.0             | <0.001-0.58           |                          |                         |                          |               |                                  |          |       |
| 5A         | sniffing DA frequency                  |                            | 20                          | 0.101                   |                       | Peason                   |                         | T=2.5                    | 0.024         |                                  |          |       |
|            |                                        |                            | 20                          | 0.974                   |                       |                          |                         |                          |               |                                  |          |       |
| 5B         | sniffing DA level                      |                            | 19                          | 0.186                   |                       | Peason                   |                         | T=0.39                   | 0.08          |                                  |          |       |
|            |                                        |                            | 19                          | 0.048                   |                       |                          |                         |                          |               |                                  |          |       |
| Supple S3A | EGF+Saline/EGF+CNO                     | sniffing duration          | 10/10                       | 0.123, 0.340            | 0.543                 | Student T                | saline vs CNO           | T=0.958                  | 0.351         |                                  |          |       |
| Supple S3B | EGF+Saline/EGF+CNO                     | frequency                  | 56/51                       | 0.562, 0.737            | 0.246                 | Student T                | saline vs CNO           | T=0.0560                 | 0.955         |                                  |          |       |
| Supple S4A | EGF+Saline/EGF+CNO, time               | Distance                   | 7/7 x 12                    | 0.138-0.964             | 0.005(a)-0.876        | two-way * repeated ANOVA | saline vs CNO           | main EGF F=0.253         | 0.624         |                                  |          |       |
|            |                                        |                            |                             |                         |                       |                          |                         | main time F=63.971#      | <0.001        |                                  |          |       |
|            |                                        |                            |                             |                         | a)0.005               | Mann-Whitney             | saline vs CNO           | interaction F=1.261#     | 0.254         |                                  |          |       |
|            |                                        |                            |                             |                         |                       |                          |                         | U=24, Z=0.064            | 0.949         | done                             |          |       |
| Supple S4B | EGF+Saline/EGF+CNO, time               | Rearing                    | 7/7 x 12                    | 0.017(b-e)-0.954        | 0.177-0.925           | two-way * repeated ANOVA | saline vs CNO           | main EGF F=0.000         | 0.990         |                                  |          |       |
|            |                                        |                            |                             |                         |                       |                          |                         | main time F=6.914#       | <0.001        |                                  |          |       |
|            |                                        |                            |                             |                         |                       |                          |                         | interaction F=1.207#     | 0.321         |                                  |          |       |
|            |                                        |                            |                             |                         |                       | b)0.039                  |                         | Mann-Whitney             | saline vs CNO | U=18.5, Z=0.768                  | 0.442    | 1.000 |
|            |                                        |                            |                             |                         |                       | c)0.028                  |                         | Mann-Whitney             | saline vs CNO | U=20, Z=0.575                    | 0.565    | 1.000 |
| d)0.019    |                                        | Mann-Whitney               | saline vs CNO               | U=24.5, Z=1.282         | 0.200                 | 0.800                    |                         |                          |               |                                  |          |       |
| e)0.017    |                                        | Mann-Whitney               | saline vs CNO               | U=20, Z=0.575           | 0.565                 | 0.565                    |                         |                          |               |                                  |          |       |
| Supple S4C | EGF+Saline/EGF+CNO                     | Stereotypy                 | 7/7 x 12                    | 0.028(f)-0.938          | 0.068-1.000           | two-way * repeated ANOVA | saline vs CNO           | main EGF F=0.0370        | 0.850         |                                  |          |       |
|            |                                        |                            |                             |                         |                       |                          |                         | main time F=37.73#       | <0.001        |                                  |          |       |
|            |                                        |                            |                             |                         |                       |                          |                         | interaction F=0.778#     | 0.559         |                                  |          |       |
|            |                                        |                            |                             | f)0.028                 |                       | Mann-Whitney             | saline vs CNO           | U=21, Z=0.447            | 0.655         | done                             |          |       |

Abbreviations used>>>CON; control rats, EGF;EGF-challenged rats, DA; dopamine levels, SWB; spikes within bursts

Note 1; NA denotes Not Applied with the given high number of groups

Note 2; # denotes the Greenhouse-Geisser compensation.

Note 3; \* Rat locomotion scores are known to be desitubed with the Gaussian distribution.

Note 4; a-f) represent the expeptional data points violating the normality or homogeneity and thus are subjected to Mann-Whitney test additionally.
